# Supplementary material for: Identification and Antioxidant Capacity of Free and Bound Phenolics in Six Varieties of Mulberry Seeds Using UPLC-ESI-QTOF-MS/MS
Source: MDPI journal article supplement (doi:10.3390/antiox11091764), 2022-09-07

**Figure S1** UPLC chromatogram of FPs at 280 nm. A: Shisheng; B: Yu 711; C: Guiyou 12; D: Guiyou

62, E: Teyou 2; F: Yue 69851.

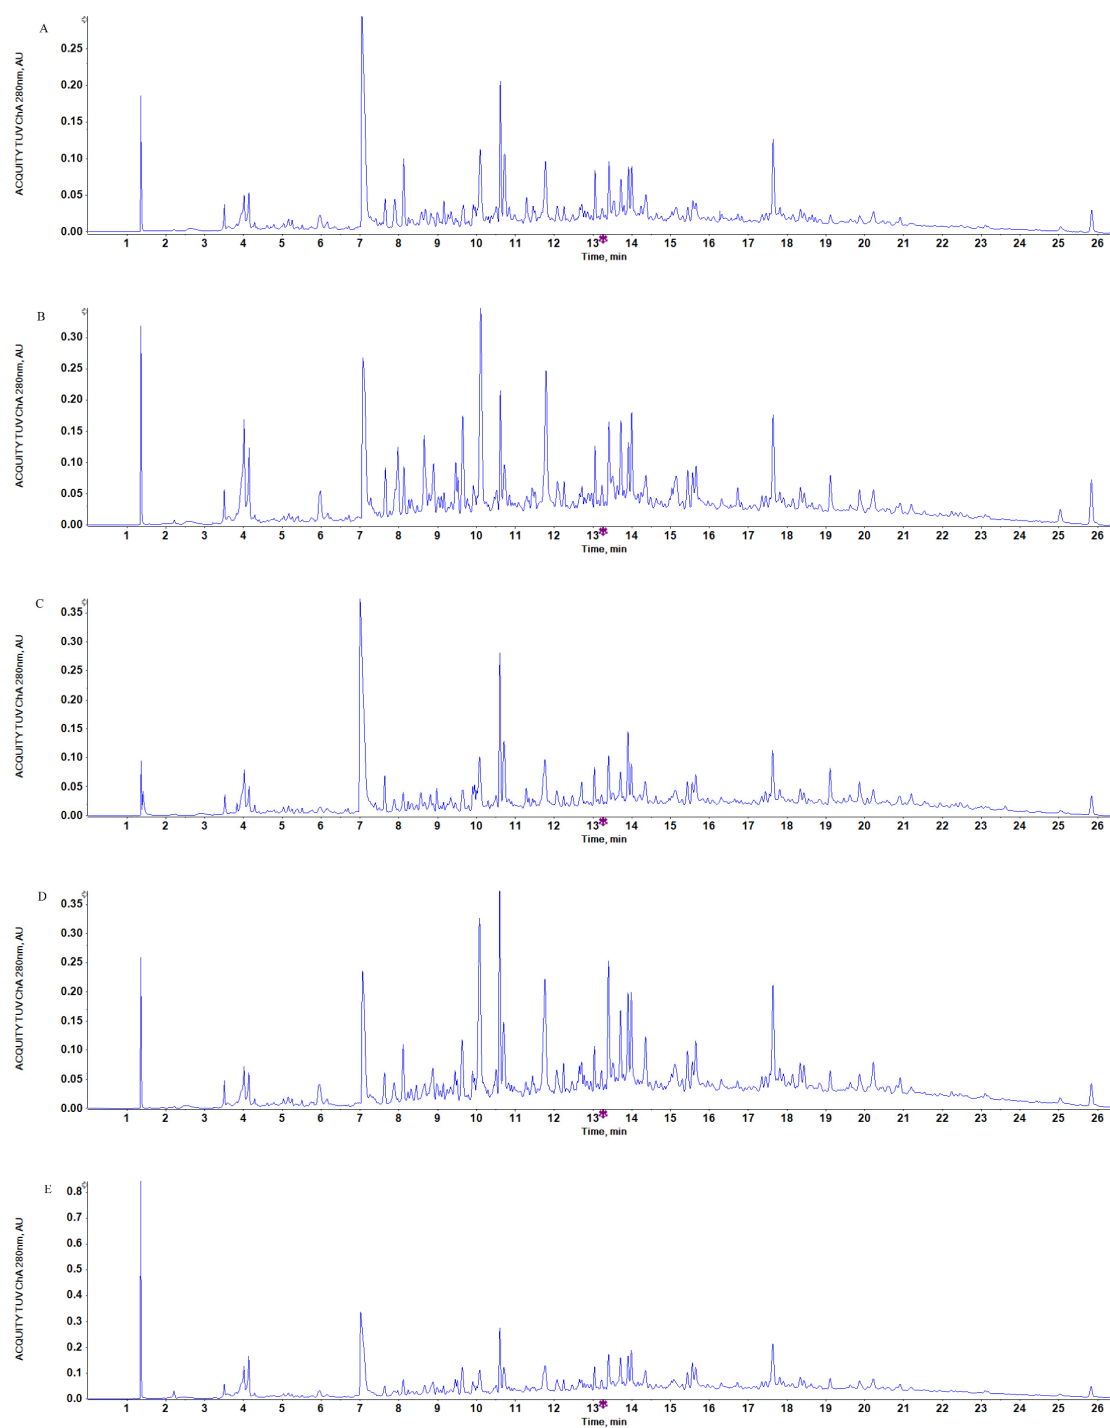

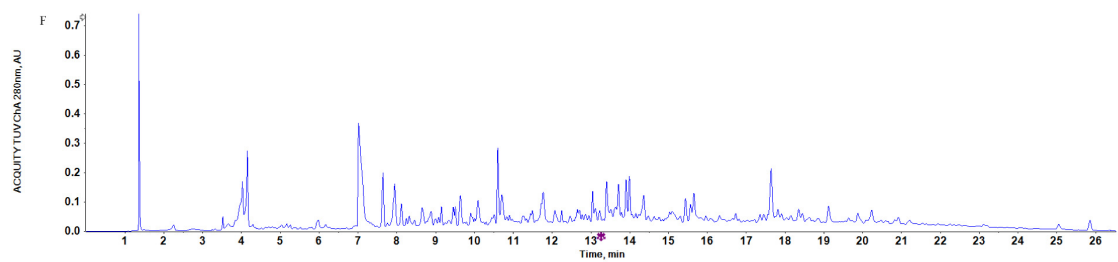

**Figure S2** UPLC chromatogram of BPs at 280 nm. A: Shisheng; B: Yu 711; C: Guiyou 12; D: Guiyou 62, E: Teyou 2; F: Yue 69851.

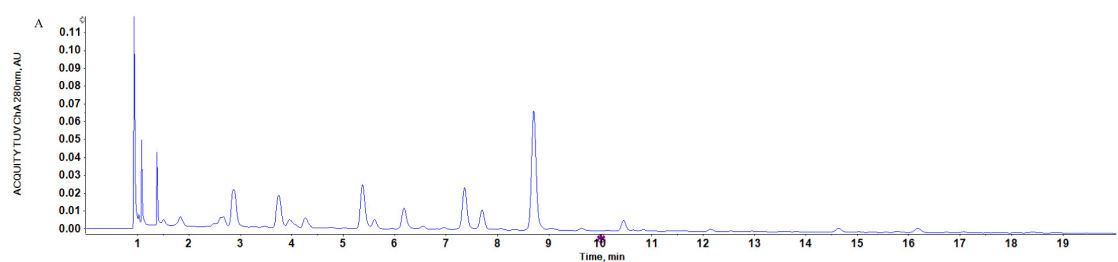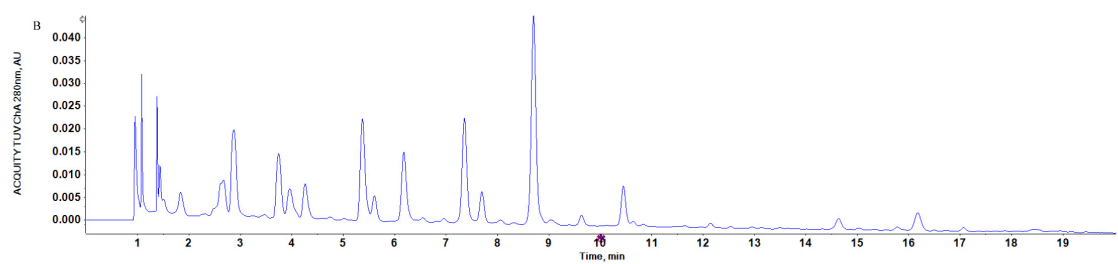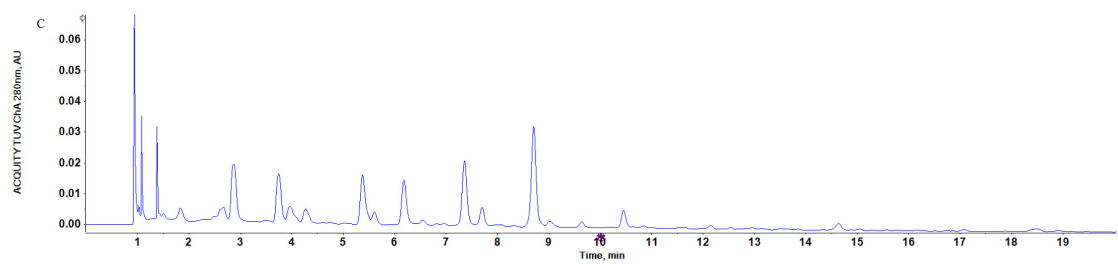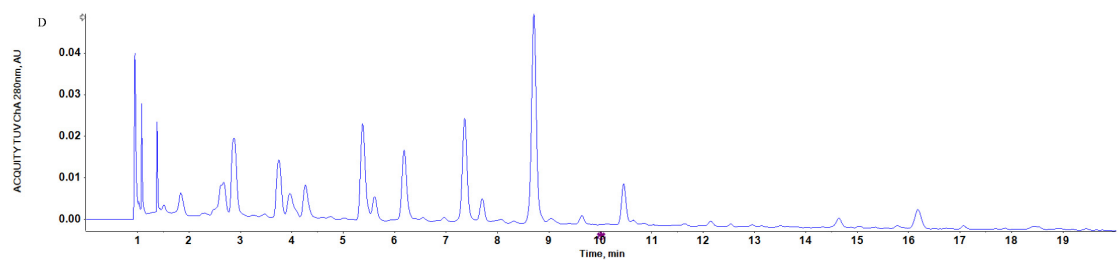

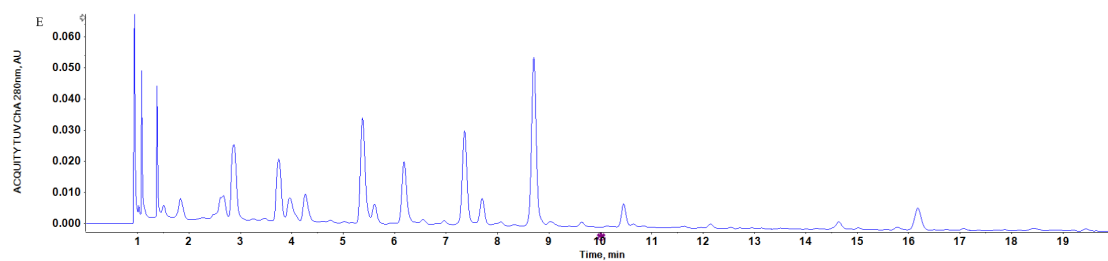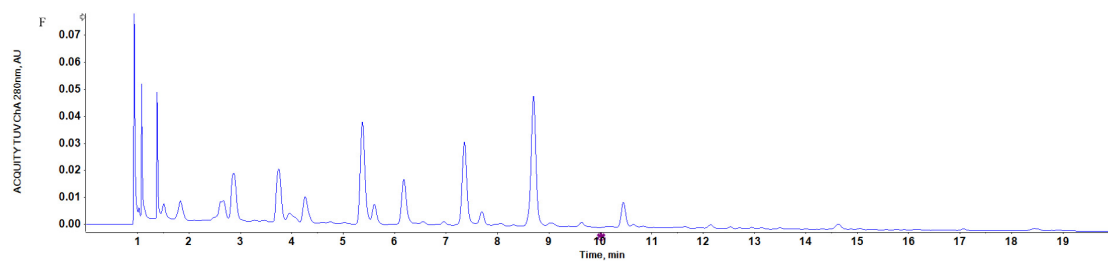

Supplement: s1 [file s1]
